# Supplementary material for: A chiral magnetic molybdenum disulfide nanocomposite for direct enantioseparation of RS-propranolol
Source: Royal Society of Chemistry journal article supplement (doi:10.1039/d2ra04866c), 2023-01-01
Supplement: d2ra04866c1.pdf [file d2ra04866c1.pdf]

## Electronic Supplementary Information

### A Chiral Magnetic Molybdenum Disulfide Nanocomposite for Direct Enantioseparation of *RS*-Propranolol

Hai-Rong Yu,<sup>†ab</sup> Li Lei,<sup>†a</sup> Yan-Lin Wang<sup>a</sup>, Xi Wang<sup>a</sup>, Ting Liang<sup>\*ab</sup> and Chang-Jing Cheng<sup>\*ab</sup>

<sup>a</sup> College of Chemistry and Environment, Southwest Minzu University, Chengdu, Sichuan, 610041, China. E-mail: liangting@swun.edu.cn; chengcj@swun.edu.cn.

<sup>b</sup> Key Laboratory of Pollution Control Chemistry and Environmental Functional Materials for Qinghai-Tibet Plateau of the National Ethnic Affairs Commission, College of Chemistry and Environment, Southwest Minzu University, Chengdu, Sichuan 610041, China

<sup>†</sup>Those authors contributed equally to this work.

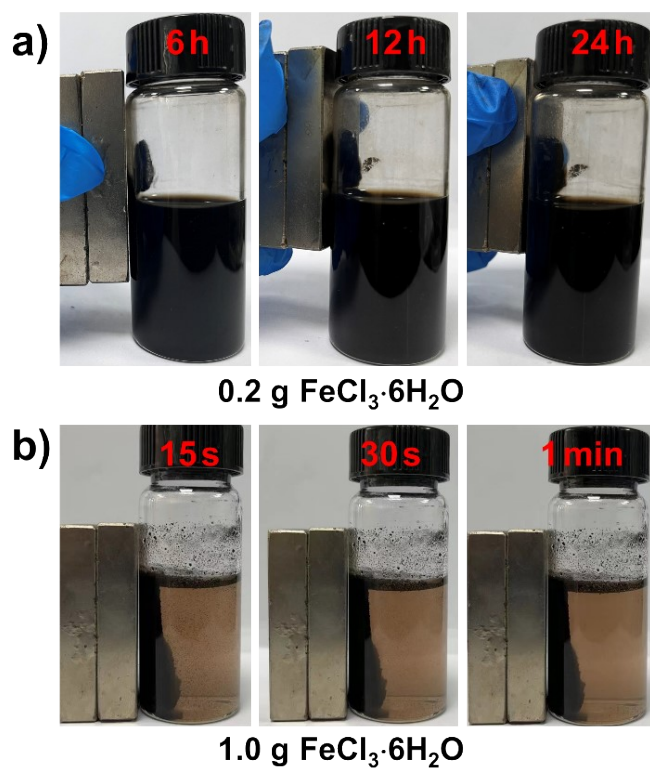

**Fig. S1** Magnetic separability of the  $\text{MMoS}_2$ -0.2 and  $\text{MMoS}_2$ -1.0 samples synthesized using 0.2 g (a) and 1.0 g (b)  $\text{FeCl}_3 \cdot 6\text{H}_2\text{O}$  under an EMF from aqueous solutions.

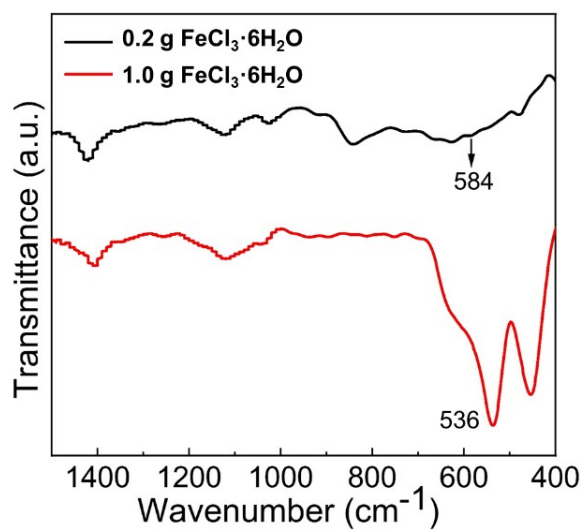

**Fig. S2** FT-IR spectra of the  $\text{MMoS}_2$  samples synthesized with different  $\text{FeCl}_3 \cdot 6\text{H}_2\text{O}$  dosages of 0.2 g (*black line*) and 1.0 g (*red line*).

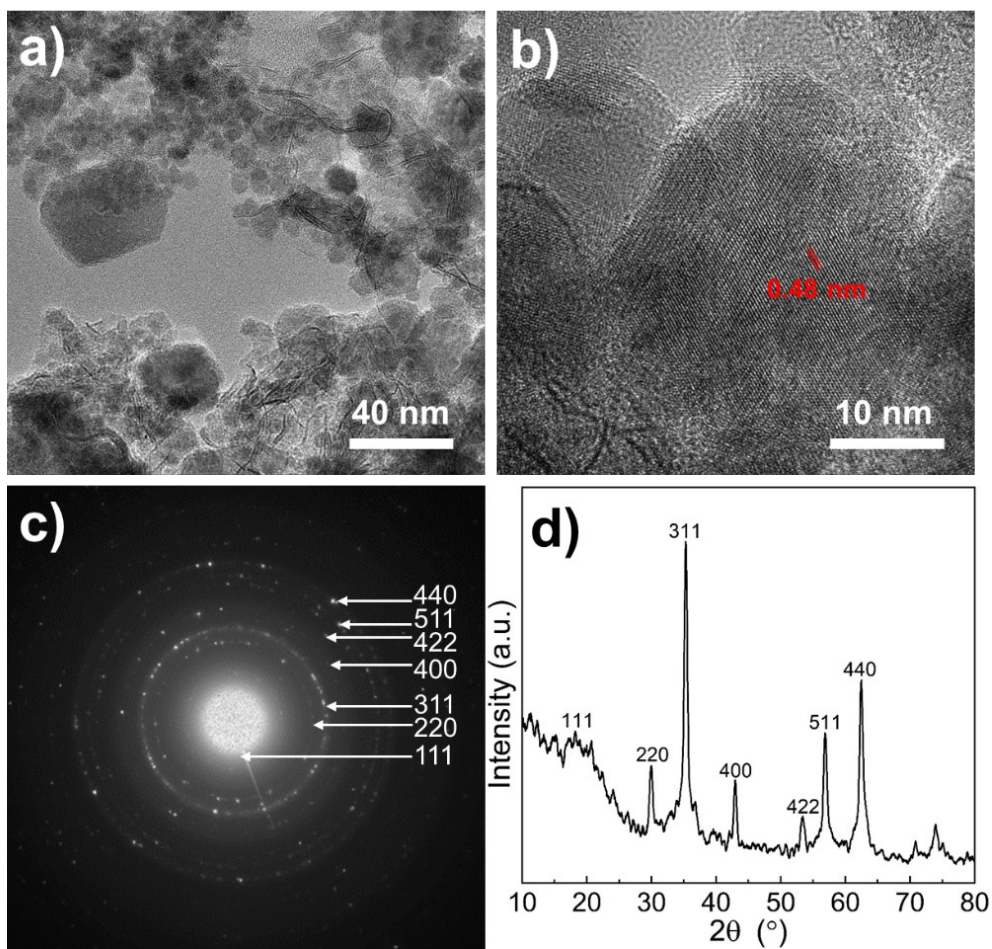

**Fig. S3** TEM image (a), high-resolution TEM image (b), SAED (c), and X-ray diffraction pattern (d) of the MMoS<sub>2</sub>.

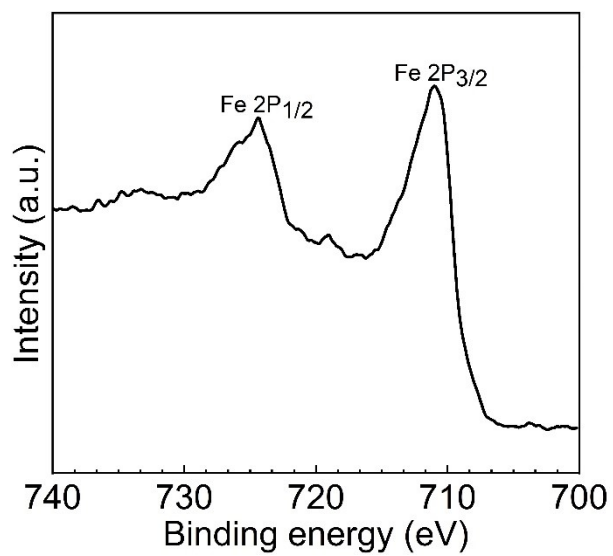

**Fig. S4** XPS survey spectra of the MMoS<sub>2</sub>.

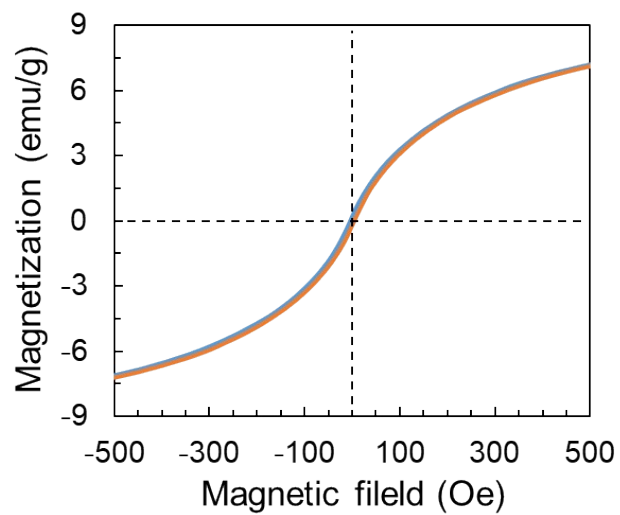

**Fig. S5** Low-field magnetic hysteresis loops of the MMoS<sub>2</sub>/PNG2-CD.

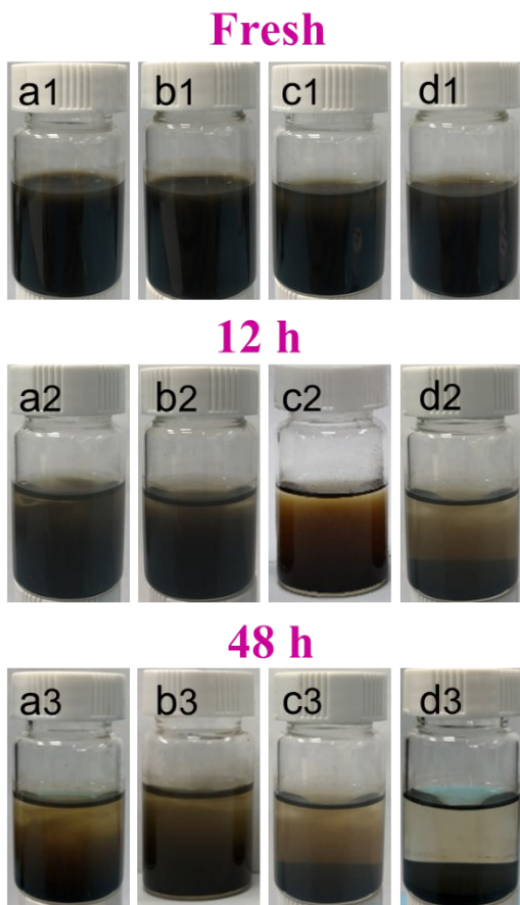

**Fig. S6** The dispersibility of the  $\text{MMoS}_2/\text{PNG1-CD}$  (a1–a3),  $\text{MMoS}_2/\text{PNG2-CD}$  (b1–b3),  $\text{MMoS}_2/\text{PNG3-CD}$  (c1–c3), and  $\text{MMoS}_2/\text{PNG4-CD}$  (d1–d3) nanocomposites in water after storing different time.

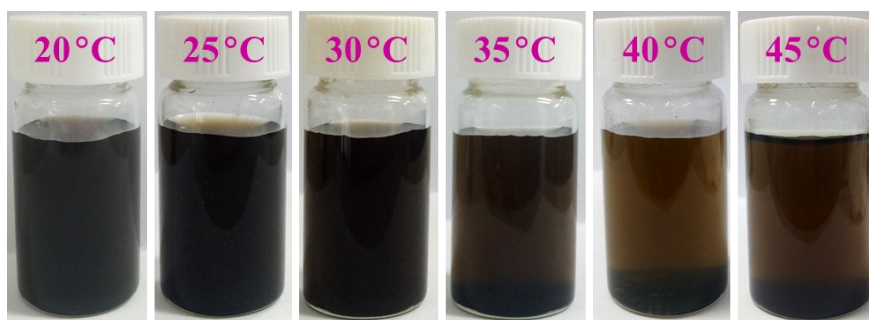

**Fig. S7** The temperature-dependent dispersibility of the MMoS<sub>2</sub>/PNG2-CD nanocomposite in water. The concentration of the MMoS<sub>2</sub>/PNG2-CD is 1.0 mg/mL.
